# Supplementary material for: The Protective Role of Bioactive Quinones in Stress-induced Senescence Phenotype of Endothelial Cells Exposed to Cigarette Smoke Extract
Source: MDPI journal article supplement (doi:10.3390/antiox9101008), 2020-10-16
Supplement: s1 [file s1]

Supplementary Materials

# The Protective Role of Bioactive Quinones in Stress-induced Senescence Phenotype of Endothelial Cells Exposed to Cigarette Smoke Extract

Ilenia Cirilli <sup>1</sup>, Patrick Orlando <sup>1</sup>, Fabio Marcheggiani <sup>1</sup>, Phiwayinkosi V. Dlodla <sup>1,2</sup>, Sonia Silvestri <sup>1,\*</sup>, Elisabetta Damiani <sup>1\*</sup> and Luca Tiano <sup>1</sup>

<sup>1</sup> Department of Life and Environmental Sciences, Polytechnic University of Marche, Ancona, Italy; [i.cirilli@pm.univpm.it](mailto:i.cirilli@pm.univpm.it) (I.C.); [p.orlando@univpm.it](mailto:p.orlando@univpm.it) (P.O.); [f.marcheggiani@univpm.it](mailto:f.marcheggiani@univpm.it) (F.M.); [l.tiano@staff.univpm.it](mailto:l.tiano@staff.univpm.it) (L.T.)

<sup>2</sup> Biomedical Research and Innovation Platform, South African Medical Research Council, Tygerberg, South Africa; [phiwayinkosi.dlodla@mrc.ac.za](mailto:phiwayinkosi.dlodla@mrc.ac.za) (P.V.D.)

\* Correspondence: [e.damiani@univpm.it](mailto:e.damiani@univpm.it) (E.D.); Tel.: +39-071-220-4135 (E.D.); [s.silvestri@univpm.it](mailto:s.silvestri@univpm.it) (S.S.); Tel.: +39-071-220-4394 (S.S.)

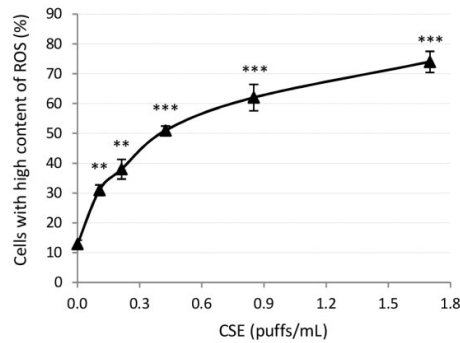

**Figure S1.** Cells with high content of ROS after 24 h treatment of young HUVECs with increasing doses of CSE. Significance was calculated with respect to young untreated cells (0 puffs/mL CSE). \*  $p \leq 0.05$ , \*\*  $p \leq 0.01$ , \*\*\*  $p \leq 0.001$ .

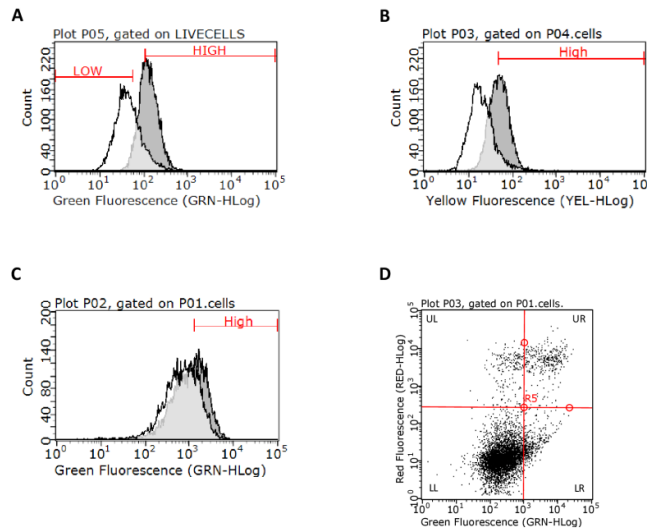

**Figure S2.** Representative flow cytometry graphs. Fluorescence distribution of (A) total ROS, (B) mitochondrial ROS, (C) mPTP opening, (D) caspase-1: LL: live cells; LR: live cells with activated caspase-1; UR: apoptotic or death cells with activated caspase-1; UL: apoptotic or death cells without activated caspase-1.

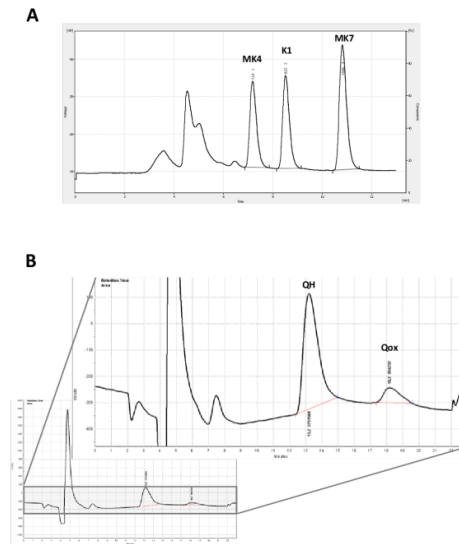

**Figure S3.** Representative chromatogram obtained by HPLC system for (A) K vitamins and (B) CoQ<sub>10</sub>.

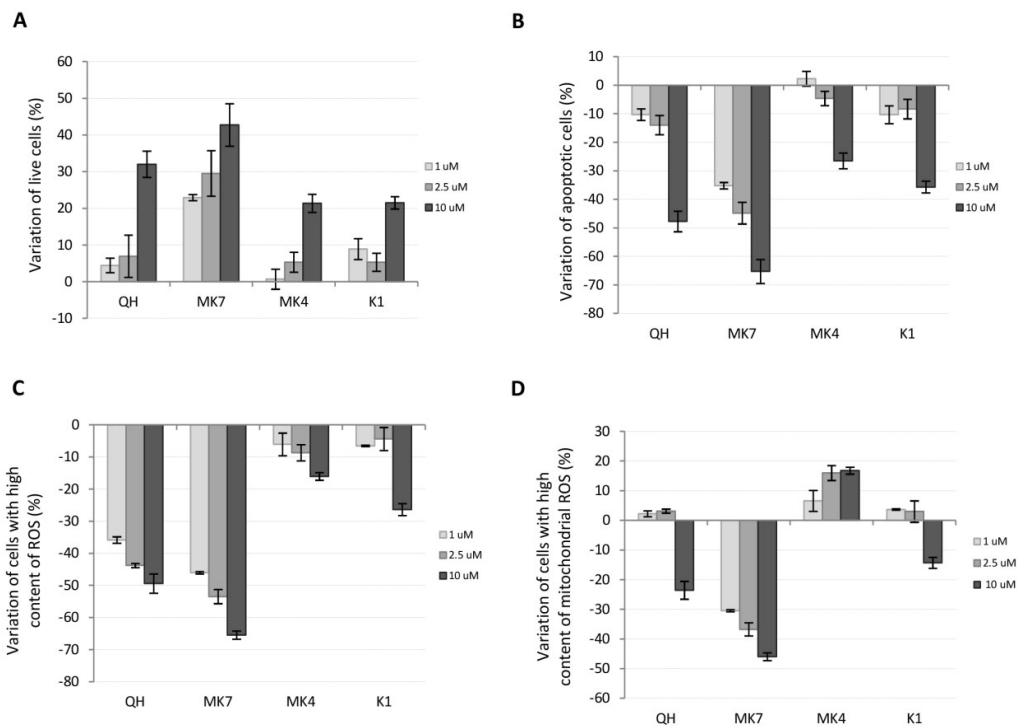

**Figure S4.** Effect of quinones supplementation on viability and oxidative stress in young HUVECs exposed to CSE (0.425 puffs/mL for 24 h). Cells were supplemented with different concentrations of quinones for 24 h followed by replacement with CSE medium containing the same quinones and incubated for a further 24 h. Variation of the percentage of: (A) live cells, (B) apoptotic cells, (C) cells with high ROS content, (D) cells with high mitochondrial ROS content.
